# Supplementary material for: Clinical characteristics and outcomes of primary sclerosing cholangitis and ulcerative colitis in Japanese patients
Source: PLoS One. 2018 Dec 20;13(12):e0209352. doi: 10.1371/journal.pone.0209352 (PMC6301618; doi:10.1371/journal.pone.0209352)
Supplement: S1 Table — (XLSX) [file pone.0209352.s001.xlsx]

## Sheet: PSC
	Male	Age at PSC diagnosis	Intra and extra hepatic type	Smoking	Alcohl abuse	AIH	UDCA	Bezafibrate	Inchin ko to	Dominant stricture	Endoscoic intervention	Death	Undergoing liver transplantation	Liver transplantation candidate	Time to liver transplantation candidate from the onset of PSC（year）	Cholangiocarcinoma	IBD	UC	Colorectal cancer
1	1	53	1	0	0	0	1	0	0	1	1	1	0	1	8.16438	0	1	0	0
2	1	56	0	0	0	0	1	0	0	0	0	0	0	0		1	0	0	0
3	1	33	0	0	0	0	1	0	0	1	1	1	0	1	16.8767	1	0	0	0
4	1	71	1	0	0	0	1	0	0	0	0	0	0	0		0	0	0	0
5	0	48	1	0	0	0	1	0	1	Unknown	1	1	0	1	4.99452	0	0	0	0
6	0	64	1	0	0	0	1	0	0	1	0	0	0	0		1	0	0	0
7	1	4	1	0	0	0	1	0	0	0	0	0	0	0		0	1	1	0
8	1	59	1	1	1	0	1	0	0	1	0	1	0	0		1	0	0	0
9	1	37	1	0	0	0	1	0	1	1	0	0	0	0		0	0	0	0
10	1	25	1	0	0	0	1	0	1	1	1	0	0	0		0	1	1	0
11	1	38	1	1	0	0	0	0	0	0	0	0	0	0		0	0	0	0
12	1	69	1	0	0	0	1	0	1	1	1	0	0	1	2.36712	0	0	0	0
13	0	32	1	0	0	0	1	1	0	1	0	0	1	1	10.7671	0	1	0	0
14	1	28	1	0	0	0	1	0	0	1	0	0	0	1	6.35342	1	0	0	0
15	1	23	1	1	1	0	1	1	0	0	0	0	0	1	9.29589	0	1	1	0
16	1	69	1	0	0	0	1	0	0	0	0	0	0	0		0	1	1	0
17	0	26	1	0	0	0	1	1	1	1	1	0	0	0		0	0	0	0
18	0	14	1	0	0	0	1	1	0	1	1	1	1	1	0.649315	0	1	1	0
19	0	69	1	0	0	0	1	1	0	1	1	1	0	1	6.25753	0	0	0	0
20	1	67	1	0	0	0	1	0	0	1	1	0	0	0		0	1	1	0
21	0	56	1	0	0	0	1	0	1	1	0	1	1	1	1.32055	1	1	1	1
22	0	59	1	0	0	0	1	1	1	1	0	0	0	0		0	0	0	0
23	1	24	1	0	0	1	1	1	1	1	1	0	0	0		0	1	1	0
24	1	31	1	0	0	0	1	1	1	1	0	0	0	0		0	1	1	0
25	1	29	1	0	0	0	0	0	0	1	1	1	0	1	1.48493	1	1	1	0
26	1	25	1	0	1	0	1	1	1	1	0	0	0	1	2.96712	0	1	1	0
27	1	22	1	0	0	0	1	1	0	1	1	0	0	0		0	0	0	0
28	1	65	1	0	0	0	1	1	0	1	1	1	0	1	0.810959	0	0	0	0
29	0	26	1	0	0	0	1	0	0	0	0	0	0	0		1	1	1	0
30	0	42	1	1	0	0	1	0	0	1	1	0	0	0		0	1	1	0
31	1	17	1	1	0	0	0	0	0	1	0	0	0	0		0	1	1	0
32	0	24	1	0	0	0	1	1	1	1	1	0	0	0		0	1	1	0
33	0	72	1	0	0	1	1	1	1	1	1	1	0	0		0	0	0	0
34	0	71	1	0	0	0	1	1	0	1	1	1	0	1	0.989041	0	1	1	1
35	1	78	1	0	0	0	1	1	1	1	1	0	0	1	7.22192	0	0	0	0
36	1	23	1	0	0	0	1	0	0	0	0	0	0	0		0	1	1	0
37	0	71	1	0	0	0	1	1	1	1	1	1	0	1	2.48219	0	0	0	0
38	0	22	1	0	0	0	1	0	1	1	1	0	0	0		0	1	1	0
39	0	61	1	0	0	0	1	1	0	1	1	0	0	1	2.89863	0	0	0	0
40	0	67	1	0	0	0	1	1	1	0	0	0	0	0		0	1	1	0
41	1	50	1	0	0	0	0	0	1	1	1	1	0	1	3.14247	0	1	1	0
42	1	25	1	1	0	0	1	0	1	1	1	0	0	0		0	1	1	0
43	0	68	1	0	0	0	1	0	0	1	1	0	0	0		0	0	0	0
44	1	29	1	0	0	0	1	1	0	1	1	0	0	0		0	1	1	0
45	0	44	1	0	0	0	1	0	0	0	0	0	0	0		0	1	1	0
46	0	72	0	1	0	0	1	0	0	0	0	0	0	1	0.221918	0	0	0	0
47	0	55	1	0	0	0	1	0	0	1	0	0	0	0		0	1	1	0
48	1	40	1	0	0	0	0	0	0	0	0	0	0	0		0	1	1	0
49	1	20	1	0	0	0	1	1	1	1	1	0	0	1	3.78082	0	1	1	0
50	1	21	0	0	0	0	0	0	0	0	0	0	0	0		0	1	1	0
51	1	38	0	0	0	0	1	0	0	0	0	0	0	0		0	1	1	0
52	1	38	0	1	0	0	1	1	1	1	0	0	0	0		0	1	1	0
53	0	61	1	0	0	0	1	0	0	1	1	0	0	1	3.12055	1	1	1	0
54	0	24	1	0	0	0	1	0	0	0	0	0	0	0		0	0	0	0
55	1	47	1	0	0	0	1	1	0	1	1	0	0	0		0	1	1	0
56	1	22	0	0	0	0	1	0	0	0	0	0	0	0		0	1	1	0
57	1	29	1	0	0	0	1	1	0	0	0	0	0	0		0	0	0	0
58	1	17	1	0	0	0	1	0	0	1	0	0	0	0		0	0	0	0
59	1	23	1	1	0	0	1	1	1	0	0	1	0	1	1.0274	0	1	0	0
60	0	37	1	0	0	0	1	1	0	0	0	0	0	0		0	0	0	0
61	1	11	1	0	0	0	1	0	0	0	0	0	0	0		0	1	1	0
62	1	14	1	0	0	0	1	0	0	0	0	0	0	0		0	1	1	0
63	0	58	1	0	0	0	1	0	0	0	0	0	0	0		0	0	0	0
64	1	34	1	1	0	0	1	0	0	0	0	0	0	0		0	1	1	0
65	0	72	1	0	0	0	1	0	0	1	1	0	0	0		0	0	0	1
66	1	50	1	1	0	0	1	0	0	1	1	0	0	1	0.315068	1	0	0	0
67	1	17	1	0	0	0	0	0	0	0	0	0	0	0		0	1	1	0
68	1	75	1	1	0	0	1	0	0	1	1	0	0	0		1	0	0	0
69	1	16	1	0	0	0	1	0	0	0	0	0	0	0		0	1	1	0
